## Call for The D'Alembert Award for Multibody System Dynamics and The Lyapunov Award for Nonlinear Dynamics

The *Technical Committee on Multibody Systems and Nonlinear Dynamics* (MSND-TC) of the ASME Design Engineering Division solicits nominations for the *D'Alembert Award* and the *Lyapunov Award*. These awards will be presented at the *6th ASME International Conference on Multibody Systems, Nonlinear Dynamics and Control*, as part of the *ASME 2007 International Design Engineering Technical Conferences* to be held in Las Vegas, Nevada, September, 2007.

The *D'Alembert Award* is established to recognize lifelong contributions to the field of multibody system dynamics.

The *Lyapunov Award* is established to recognize lifelong contributions to the field of nonlinear dynamics.

**Selection Criteria and Nomination Materials:** These awards recognize lifelong impact of research contributions, education and training of researchers and/or practitioners, and overall leadership in advancing the field. Nominations should include (1) a nomination letter describing the field of, and the impact of, the nominee, (2) a curriculum vitae, and (3) up to five letters of support. All nomination materials must be submitted in electronic (pdf) format.

**Submission Instructions:** Submit nomination materials before

**July 1, 2006**

to either one of the Co-Chairs of the Awards Subcommittee.

Professor Olivier A. Bauchau  
Co-Chair MSND-TC Awards  
School of Aerospace Engineering  
Georgia Institute of Technology  
270 Ferst Street, SST Building, Rm. 212  
Atlanta, GA 30332-0150  
Email: olivier.bauchau@ae.gatech.edu  
Tel: (404) 894-0042  
Fax: (404) 894-2760

Professor Noel C. Perkins  
Co-Chair MSND-TC Awards Subcommittee  
Mechanical Engineering  
University of Michigan  
2350 Hayward St.  
Ann Arbor, MI 48109-2125  
Email: ncp@umich.edu  
Tel: (734) 936-0403  
Fax: (734) 615-6647
